# Supplementary material for: Impact of South American biomass burning emissions on elevated South Atlantic upper tropospheric ozone
Source: Copernicus journal article supplement (doi:10.5194/egusphere-2025-5372), 2025-12-11
Supplement: Supplementary file 1 [file egusphere-2025-5372-supplement.pdf]

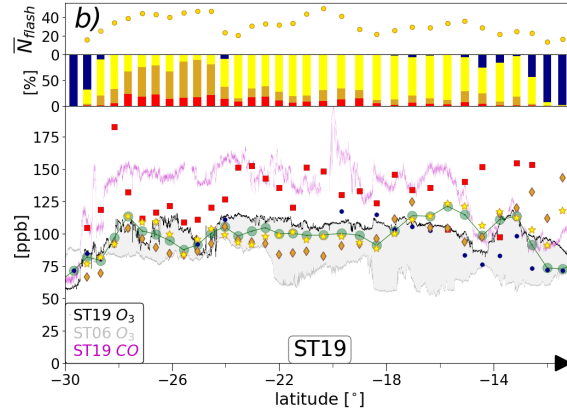

Figure S1: Simulated and observed  $O_3$  mixing ratios with enhanced VOC mixing ratios for scenario *FLASH\_noBL*.

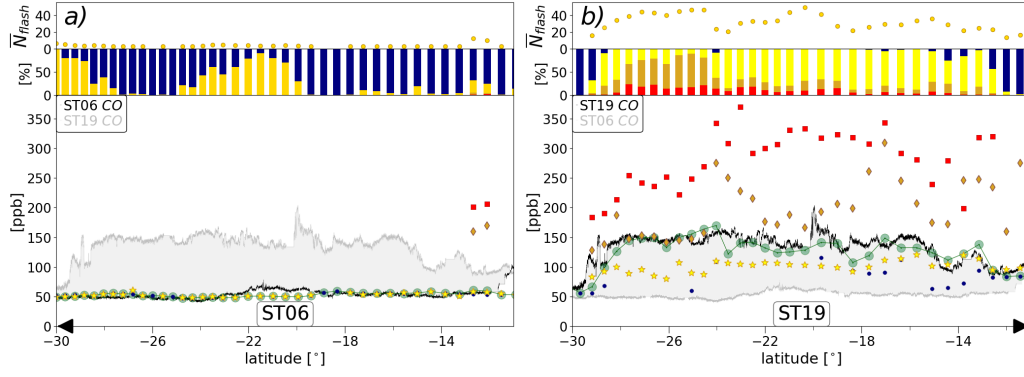

Figure S2: Simulated and observed CO mixing ratios.

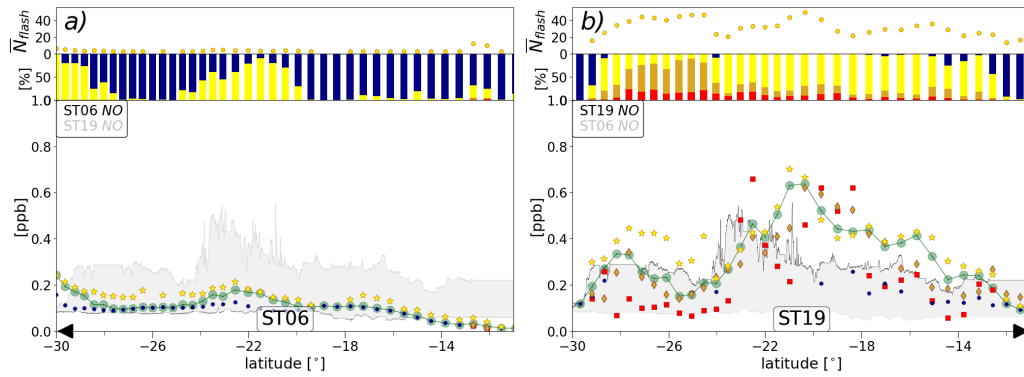

Figure S3: Simulated and observed NO mixing ratios.

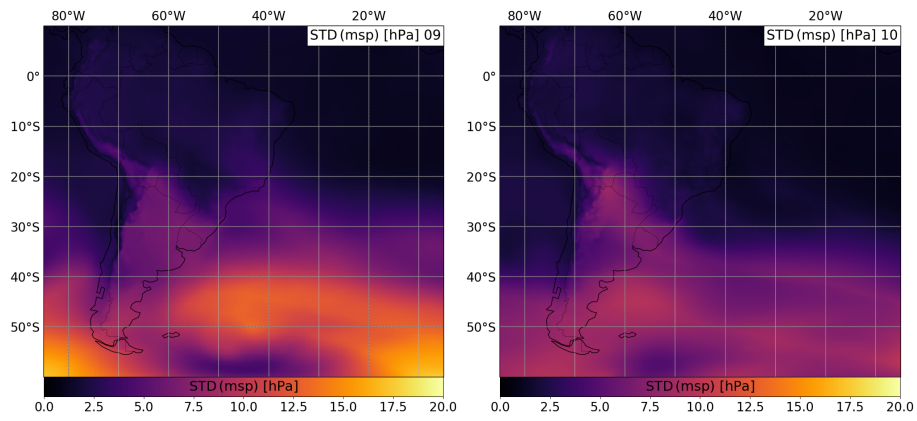

Figure S4: Plots show the standard deviation of the mean sea level pressure for the 7 days prior flights ST06 (left) and ST19 (right).
